# Supplementary material
Source: ML conference proceedings conference paper supplement (https://openaccess.thecvf.com/content/CVPR2023/html/Chowdhury_What_Can_Human_CVPR_2023_paper.html)
Supplement: Supplementary file 1 [file Chowdhury_What_Can_Human_CVPR_2023_supplemental.pdf]

# What Can Human Sketches Do for Object Detection?

## Supplemental material

Pinaki Nath Chowdhury Ayan Kumar Bhunia Aneeshan Sain Subhadeep Koley

Tao Xiang Yi-Zhe Song

SketchX, CVSSP, University of Surrey, United Kingdom.

{p.chowdhury, a.bhunias, a.sain, s.koley, t.xiang, y.song}@surrey.ac.uk

### A. Human Study on Part-level Object Detection

Due to the lack of annotation, a quantitative evaluation of part-level object detection is infeasible. Nonetheless, we measure the real-world usability of our sketch-enabled object detection framework using Mean Opinion Score (MOS) by asking 10 people to draw 20 part-level sketches and rate from 1 to 5 (bad  $\rightarrow$  excellent) based on their opinion of how closely the queried object part was detected. Accordingly, we obtain a MOS (mean  $\pm$  variance of 200 responses) of  $3.67 \pm 0.6$ .

### B. Preliminary Study on Occluded Objects

In addition to category-level, fine-grained, and part-level object detection, we further qualitatively test the generalisability of the system to detect occluded objects as:

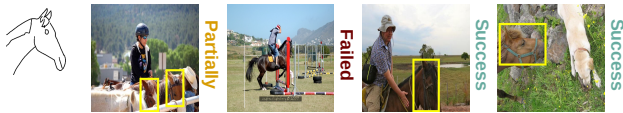

While we show some successful, failed, and partially detected cases, future works can further investigate the role of sketch and foundation models like CLIP [4] for occluded object detection.

### C. Relation to Open World setup

In open world setup, a model trained on  $C$  known classes can recognise the unknown class and update the base model via incremental learning [1, 3]. Our method already works in open world setup as it detects in zero-shot, open-vocab setup, i.e., it works regardless of whether the query sketch is in the train set or not.

### D. Detection across Different Poses

Our object detection has multiple setups: (i) for category-level OD, the sketch of object O1 (“zebra”) in image I1 will detect the same object O1 in a different image I2 *even with a different pose* (“sitting” or “standing”). (ii) For fine-grained OD, the sketch of object

O1 in image I1 will only detect the same object O1 in a different image I2 if it has the *same pose*, e.g., detect only “zebras *sitting down*” amongst a herd of “zebras”. Figure below shows qualitative results for clarity.

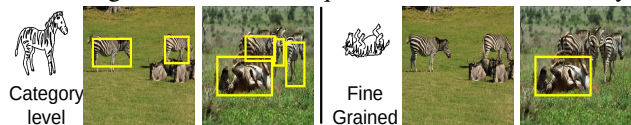

### E. Additional Ablation Study

(i) Varying prompt length  $P = \{1, 3, 5\}$  in  $\{\mathbf{v}_s, \mathbf{v}_p\} \in \mathbb{R}^{P \times 768}$  changes  $AP_{.5}$  to 16.5, 17.1, and 15.9 on Sketchy-COCO [2] respectively. (ii) Replacing CLIP with VGG-based sketch encoder  $\mathcal{F}_s$  sharply drops  $AP_{.5}$  to 9.1 (iii) Increasing tiling from  $n \in [1, 7]$  to  $n \in [1, 17]$  reduces  $AP_{.5}$  to 11.3 due to high occlusion ( $n \rightarrow 17$ ).

### F. Robustness to Tiling

To test robustness, we generate occluded photos by randomly masking (10%, 30%, 50%) of GT object boundaries with zero pixel values and measure the respective drop in accuracy ( $AP_{.5}$ ) on [2]. Performance drop being less *with tiling* for E-WSDDN (by {1.7, 3.4, 5.7}) or our method (by {1.6, 3.3, 5.4}), than *without tiling* in WSDDN (by {3.1, 5.2, 7.5}) verifies robustness due to tiling on object detection.

### G. Clarification on CutMix [5] vs. our Tiling

(i) Our novelty lies in adapting well-known modules (CLIP, SBIR) to train an object detector from only object-level sketch-photo pairs (each photo has only one object) without any bounding-box annotations. (ii) Despite sharing a common technical implementation, CutMix [5] is a data *augmentation* tool that typically replaces a patch in one *existing* scene-photo with that from another. Contrarily, tiling is a data *synthesis* tool that combines multiple object-level photos in the SBIR dataset to *newly create* a scene photo for subsequent training.

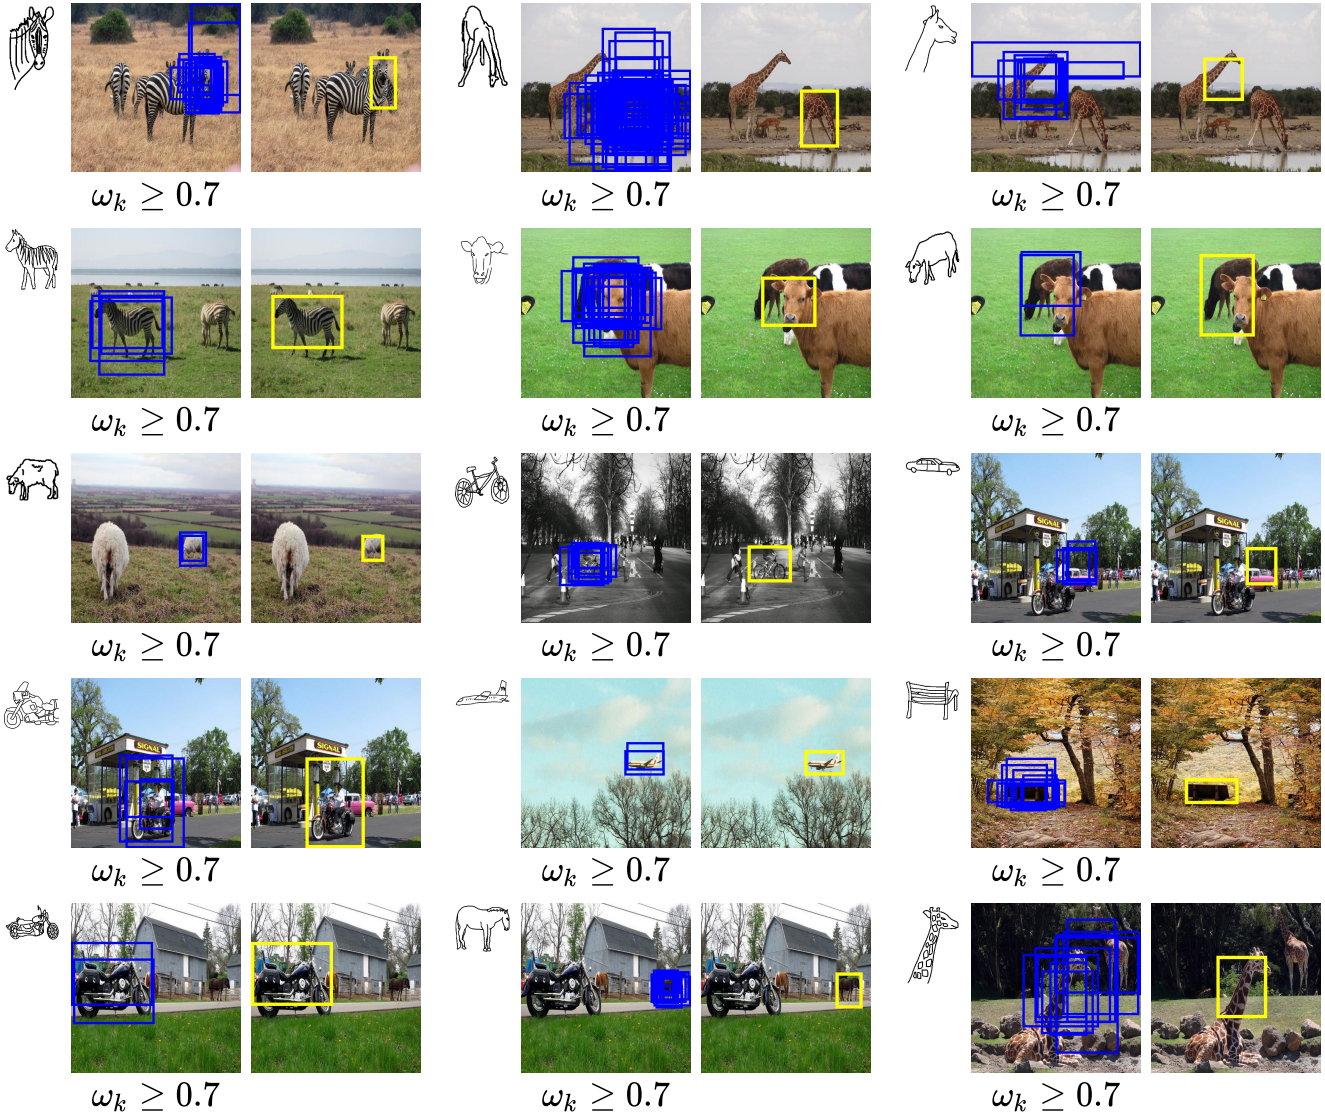

Figure A. Additional qualitative results for fine-grained and part-level object detection on SketchyCOCO. Note both the **Blue** and **Yellow** boxes are network predictions and not ground truth. The **Blue** boxes are predictions from the network prior to using Non-maximum suppression (NMS) with the confidence score of the predicted box  $\omega_k \geq 0.7$ . The **Yellow** boxes are the resulting predictions after applying NMS with  $\text{IoU} \geq 0.3$

## References

- [1] Abhijit Bendale and Terrance Boulton. Towards Open World Recognition. In *CVPR*, 2015. 1
- [2] Chengying Gao, Qi Liu, Qi Xu, Limin Wang, Jianzhuang Liu, and Changqing Zou. Sketchycoco: Image generation from freehand scene sketches. In *CVPR*, 2020. 1
- [3] K J Joseph, Salman Khan, Fahad Shahbaz Khan, and Vineeth N Balasubramanian. Towards Open World Object Detection. In *CVPR*, 2021. 1
- [4] Alec Radford, Jong Wook Kim, Chris Hallacy, Aditya Ramesh, Gabriel Goh, Sandhini Agarwal, Girish Sastry, Amanda Askell, Pamela Mishkin, Jack Clark, Gretchen Krueger, and Ilya Sutskever. Learning transferable visual models from natural language supervision. In *ICML*, 2021. 1
- [5] Sangdoon Yun, Dongyoon Han, Seong Joon Oh, Sanghyuk Chun, Junsuk Choe, and Youngjoon Yoo. Cutmix: Regularization strategy to train strong classifiers with localizable features. In *ICCV*, 2019. 1
